## Correction: CCR4 promotes metastasis via ERK/NF- $\kappa$ B/MMP13 pathway and acts downstream of TNF- $\alpha$ in colorectal cancer

Baochi Ou, Jingkun Zhao, Shaopei Guan, Hao Feng, Xiongzhi Wangpu, Congcong Zhu, Yaping Zong, Junjun Ma, Jing Sun, Xiaohui Shen, Minhua Zheng, Aiguo Lu

Copyright: Baochi Ou et al. This is an open-access article distributed under the terms of the Creative Commons Attribution License (CC-BY), which permits unrestricted use, distribution, and reproduction in any medium, provided the original author and source are credited.

**Present:** A reference for this paper was accidentally omitted from the article.

**Correct:** The missing reference appears below.

15. Al-haidari AA, Syk I, Jirström K, Thorlacius H. CCR4 mediates CCL17(TARC)-induced migration of human colon cancer cells via RhoA/Rho-kinase signaling. *Int J Colorectal Dis.* 2013; 28:1479-1487.

Original article: *Oncotarget.* 2016; 7:47637-47649. doi: 10.18632/oncotarget.10256
